# Supplementary material for: Signalling of multiple interleukin (IL)‐17 family cytokines via IL‐17 receptor A drives psoriasis‐related inflammatory pathways
Source: PubMed Central journal article supplement — Br J Dermatol. 2021 May 31;185(3):585–94. doi: 10.1111/bjd.20090 (PMC8453543; doi:10.1111/bjd.20090), 2021-05-31
Supplement: BJD-185-585-s005.pdf [file BJD-185-585-s005.pdf]

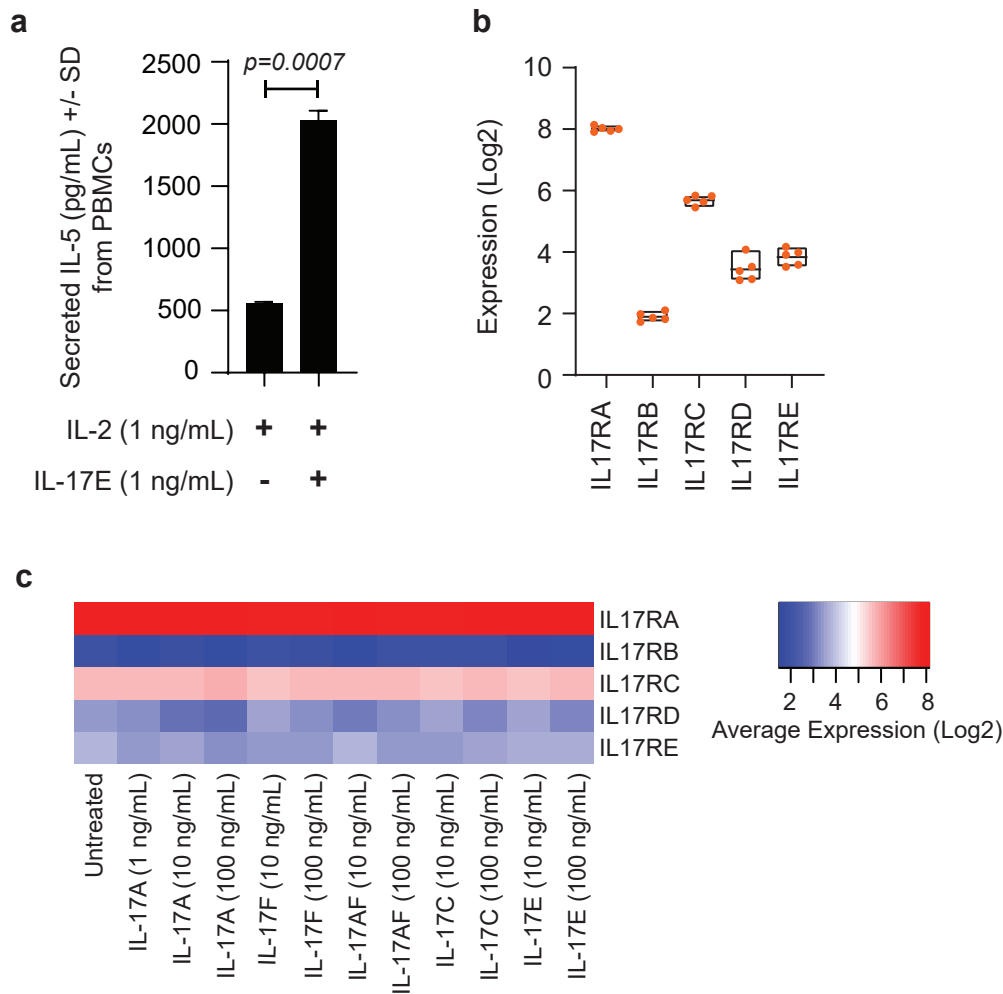

**Figure S2: Bioactivity of IL-17E in PBMCs and *IL17R* expression levels in *ex vivo* cultured human skin.** a) IL-5 release from human PBMCs in response to stimulation with IL-17E (1 ng/mL) for 6 days. IL-5 protein was measured by ELISA and the concentrations in pg/mL are plotted as mean  $\pm$  SD. b) Gene expression (Log<sub>2</sub> fold-change) of *IL17R* in unstimulated *ex vivo* cultured human skin as measured by whole-transcript arrays (Affymetrix Human Gene ST 2.1), c) Unclustered heatmap of *IL17R* in *ex vivo* cultured human skin after stimulation with IL-17 family cytokines as indicated. PBMCs, peripheral blood mononuclear cells.
