# Supplementary material for: Signalling of multiple interleukin (IL)‐17 family cytokines via IL‐17 receptor A drives psoriasis‐related inflammatory pathways
Source: PubMed Central journal article supplement — Br J Dermatol. 2021 May 31;185(3):585–94. doi: 10.1111/bjd.20090 (PMC8453543; doi:10.1111/bjd.20090), 2021-05-31
Supplement: BJD-185-585-s006.pdf [file BJD-185-585-s006.pdf]

**a**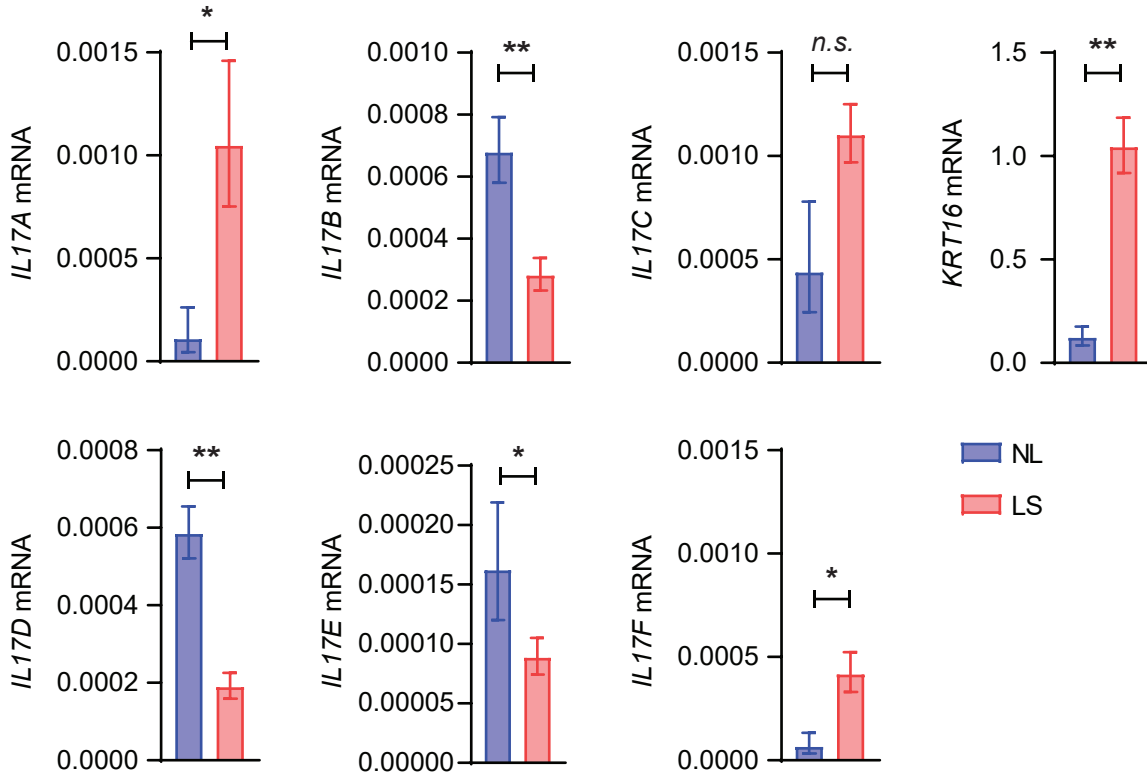**b**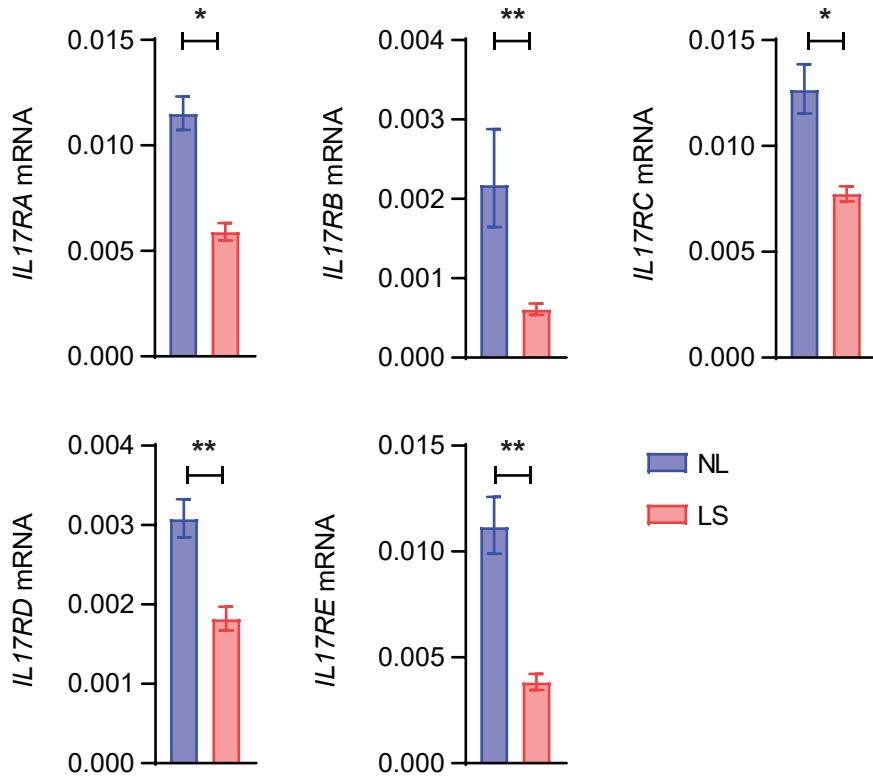**c**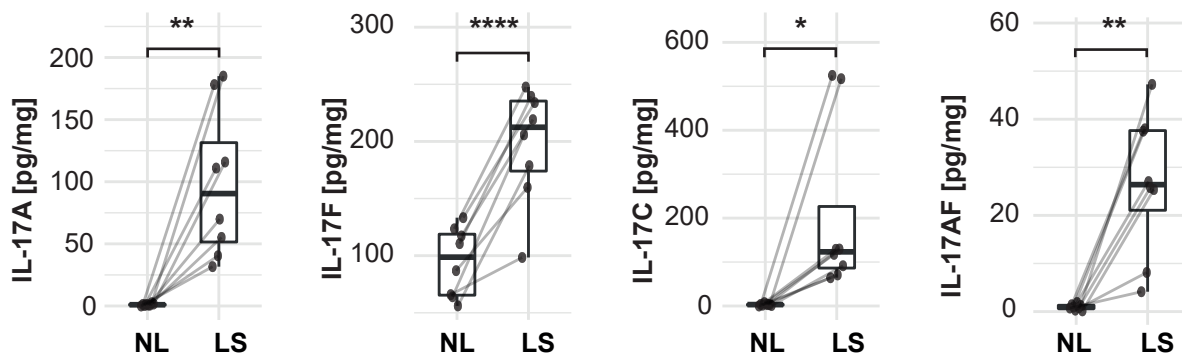

**Figure S1: Expression of IL-17 family cytokines and receptors in psoriasis skin biopsies.**

Gene expression of a) *IL17* family cytokines and *KRT16* and b) *IL17R* in paired samples of lesional and non-lesional skin (cohort III, n=6). mRNA levels were undetectable for IL17A, IL17C and IL17F in non-lesional skin from two of the six patients. RPLP0, PPIA and GAPDH were used as reference genes for normalization. Bars show mean mRNA expression ( $2^{\Delta Ct}$ ) +/- SEM. p values were calculated via marginal means (i.e. least-square means) and were Benjamini-Hochberg adjusted for multiple testing. b) Gene expression of *IL17R* on the same samples as described in (a). c) Protein levels of IL-17 family cytokines in paired samples of lesional and non-lesional skin (cohort IV, n=8) using ELISA or MSD kits. Protein levels (pg/mg of total protein) are plotted as means with lower and upper hinges corresponding to 25th and 75th percentiles. ns  $p > 0.05$ , \* $p < 0.05$ , \*\* $p < 0.01$ , \*\*\* $p < 0.001$ .
